# Supplementary material
Source: MDPI journal article supplement (https://www.mdpi.com/2225-1154/3/4/812)
Supplement: s1 [file s1]

## Supplemental Material

# Perceptions of Obvious and Disruptive Climate Change: Community-Based Risk Assessment for Two Native Villages in Alaska. *Climate* 2015, 3, 812–832

Jon Rosales <sup>1,\*</sup> and Jessica L. Chapman <sup>2</sup>

<sup>1</sup> Environmental Studies, St. Lawrence University, 23 Romoda Drive, Canton, NY 13617, USA

<sup>2</sup> Math, Computer Science, and Statistics, St. Lawrence University, Canton, NY 13617, USA;  
E-Mail: jchapman@stlawu.edu

\* Author to whom correspondence should be addressed; E-Mail: jrosales@stlawu.edu;  
Tel.: +1-315-229-5852; Fax: +1-315-229-5802.

**Table S1.** Elements included in each of the broader categories of change.

| Category | Elements of change                                                                                                                                                                                                                                                                                                                      |
|----------|-----------------------------------------------------------------------------------------------------------------------------------------------------------------------------------------------------------------------------------------------------------------------------------------------------------------------------------------|
| Coast    | <p>The coastline is not as flat as it used to be</p> <p>Beaches are not as wide as they used to be</p> <p>The size of the grains on the beaches has changed</p> <p>The tundra is breaking off more into the ocean</p> <p>The tundra is breaking off more in to the rivers</p> <p>You can now see melting permafrost along the coast</p> |
| Ice      | <p>The sea ice goes out earlier in the spring</p> <p>When it goes out, it goes out faster</p> <p>The sea ice is not as thick as it used to be</p> <p>There is now less shorefast ice</p> <p>There is now less older ice left over from the previous year or years</p> <p>Icebergs don't come here anymore</p>                           |
| Storms   | <p>Storms are stronger now</p> <p>Storms are more dangerous now</p> <p>People are now scared of the storms</p>                                                                                                                                                                                                                          |
| Tundra   | <p>Lakes on the tundra are disappearing now</p> <p>There is less snow on the tundra now</p>                                                                                                                                                                                                                                             |

**Table S1. *Cont.***

| <b>Category</b> | <b>Elements of change</b>                                                                                                                                                                                                                                                                                                                                                                                                                                                                                                           |
|-----------------|-------------------------------------------------------------------------------------------------------------------------------------------------------------------------------------------------------------------------------------------------------------------------------------------------------------------------------------------------------------------------------------------------------------------------------------------------------------------------------------------------------------------------------------|
| Weather         | Winters do not last as long as they used to<br>Summers are now longer<br>Fall weather now lasts later into the year<br>It is harder now to know what the weather is going to be<br>like from day to day<br>The weather changes quickly now, it is not consistent<br>The prevailing wind direction has changed<br>The wind now changes more often<br>It is harder now to know what the wind will do from day<br>to day, it is less predictable<br>It rains more now<br>It now rains in the winter<br>It now rains more days in a row |

## Questionnaire

**Alaskans Sharing Indigenous Knowledge (AKSIK)**

**Obvious and Disruptive Climate Change Questionnaire**

**Summer 2012**

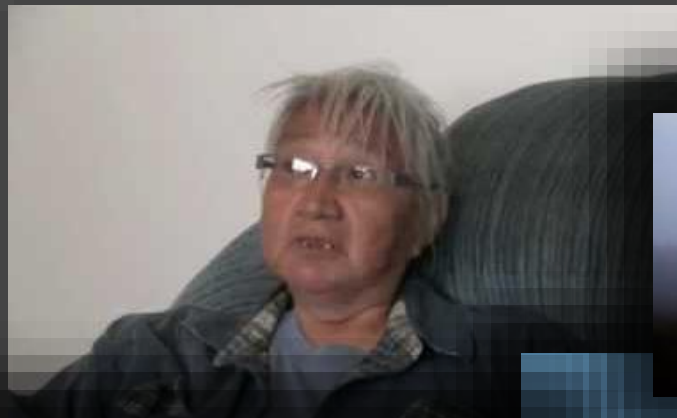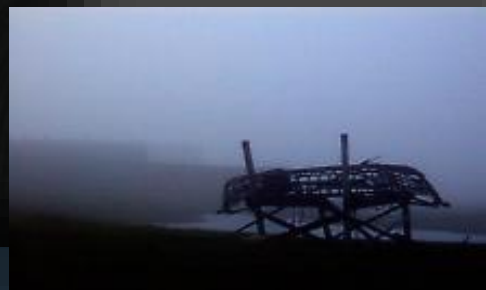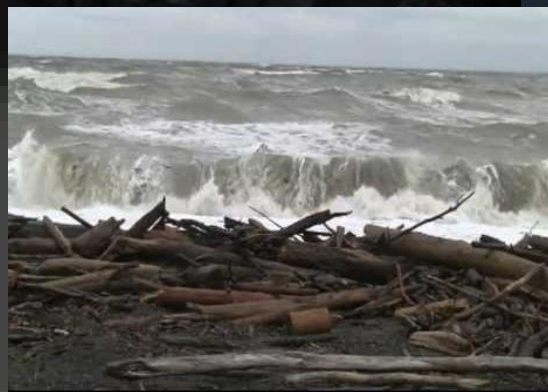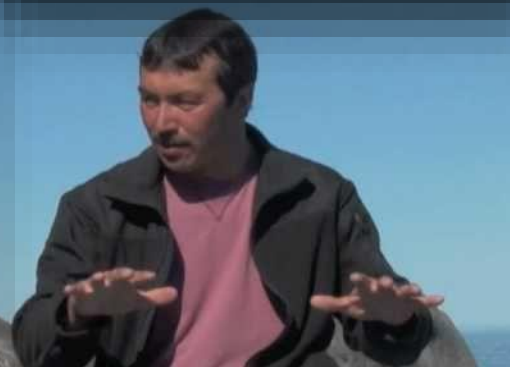

**ID: \_\_\_\_\_**

PERSONAL INFORMATION

Gender:      M      F

Year born:

Ethnicity:      Alaska Native/  
Native American      Hispanic      Multi-racial (specify)  
\_\_\_\_\_

African American      White      Asian

Outside activities:

|                      |               |                         |
|----------------------|---------------|-------------------------|
| hunting              | gathering     | joy-riding              |
| fishing              | walking       | Boating                 |
| watching the weather | going to camp | other<br>_____<br>_____ |

Top two activities:

How often do you go out of the village to do those activities?  
\_\_\_\_\_/week      /month

How far do you go out to do these activities?    \_\_ miles

How may people do you provide for?

How may people do you share food with?

**I. OBVIOUS CLIMATE CHANGE**

| Topic         | To you | To friends | To youth | I don't know |  |  |
|---------------|--------|------------|----------|--------------|--|--|
| Weather       |        |            |          |              |  |  |
|               |        |            |          |              |  |  |
| Seasons       |        |            |          |              |  |  |
|               |        |            |          |              |  |  |
|               |        |            |          |              |  |  |
| Storms        |        |            |          |              |  |  |
|               |        |            |          |              |  |  |
|               |        |            |          |              |  |  |
| Sea ice melt  |        |            |          |              |  |  |
|               |        |            |          |              |  |  |
|               |        |            |          |              |  |  |
| Sea ice types |        |            |          |              |  |  |
|               |        |            |          |              |  |  |
|               |        |            |          |              |  |  |
| Rain          |        |            |          |              |  |  |
|               |        |            |          |              |  |  |
|               |        |            |          |              |  |  |
| Wind          |        |            |          |              |  |  |
|               |        |            |          |              |  |  |
|               |        |            |          |              |  |  |
| Ocean         |        |            |          |              |  |  |
|               |        |            |          |              |  |  |
| Tides         |        |            |          |              |  |  |
|               |        |            |          |              |  |  |
| Coastline     |        |            |          |              |  |  |
|               |        |            |          |              |  |  |
|               |        |            |          |              |  |  |
| Erosion       |        |            |          |              |  |  |
|               |        |            |          |              |  |  |
| Tundra        |        |            |          |              |  |  |
|               |        |            |          |              |  |  |
|               |        |            |          |              |  |  |
| Permafrost    |        |            |          |              |  |  |

|                   |  |  |  |  |  |  |  |  |
|-------------------|--|--|--|--|--|--|--|--|
|                   |  |  |  |  |  |  |  |  |
|                   |  |  |  |  |  |  |  |  |
| Freshwater runoff |  |  |  |  |  |  |  |  |
| Sediment          |  |  |  |  |  |  |  |  |
| Plants            |  |  |  |  |  |  |  |  |
|                   |  |  |  |  |  |  |  |  |
|                   |  |  |  |  |  |  |  |  |
| Animals           |  |  |  |  |  |  |  |  |
|                   |  |  |  |  |  |  |  |  |
|                   |  |  |  |  |  |  |  |  |
| Unusual species   |  |  |  |  |  |  |  |  |
|                   |  |  |  |  |  |  |  |  |
| Fishing           |  |  |  |  |  |  |  |  |
|                   |  |  |  |  |  |  |  |  |
| Hunting           |  |  |  |  |  |  |  |  |
|                   |  |  |  |  |  |  |  |  |
|                   |  |  |  |  |  |  |  |  |
| Gathering         |  |  |  |  |  |  |  |  |
|                   |  |  |  |  |  |  |  |  |
|                   |  |  |  |  |  |  |  |  |

What kind of new or unusual plants, insects, and animals? \_\_\_\_\_

\_\_\_\_\_

\_\_\_\_\_

\_\_\_\_\_

\_\_\_\_\_

\_\_\_\_\_

\_\_\_\_\_

\_\_\_\_\_

## II. DISRUPTIVE CLIMATE CHANGE

**TURN ON RECORDER and STATE SURVEY NUMBER**

**Question: How disruptive to you are these changes?**

### Physical changes

**Please put the chips in three categories: High, Medium, Low  
Please rank the highest three topics.**

| Physical change                           | HML | Top 3 |
|-------------------------------------------|-----|-------|
| <b>Weather</b> less predictable           |     |       |
| <b>Seasons</b> have changed in the length |     |       |
| <b>Storms</b> more severe                 |     |       |
| <b>Sea ice</b> melting faster             |     |       |
| <b>Sea ice types</b> changing             |     |       |
| <b>Rain</b> more often                    |     |       |
| <b>Winds</b> have changed                 |     |       |
| <b>Ocean currents</b> have changed        |     |       |
| <b>Tides</b> have changed                 |     |       |
| <b>Coastline</b> beaches have changed     |     |       |
| <b>Erosion</b> more visible               |     |       |
| <b>Tundra</b> less snow and fewer lakes   |     |       |
| <b>Permafrost</b> melting more            |     |       |
| <b>Freshwater runoff</b> more             |     |       |
| <b>Sediment</b> in new places             |     |       |

- How do the top three affect you in being able to provide for your family?
- How do the top three affect sharing of resources?
- How do the top three affect the roles of the elders in the village?
- How do the top three affect the decision for young people to leave the village?
- Are any of these changes beneficial?

### **Biological and social changes**

1. Please rank the biological changes from highest to lowest and answer the questions below.
2. Please rank the social changes from highest to lowest and then answer the questions below.

| Biological change                    | Rank |
|--------------------------------------|------|
| Plants new types                     |      |
| Plants getting bigger                |      |
| Animals migration routes changed     |      |
| Animals migration times have changed |      |
| Unusual animals appearing            |      |
| Unusual insects appearing            |      |

| Social change                 | Rank |
|-------------------------------|------|
| Fishing less predictable      |      |
| Fishing fewer opportunities   |      |
| Hunting less predicable       |      |
| Hunting fewer opportunities   |      |
| Hunting less safe             |      |
| Gathering less predictable    |      |
| Gathering shorter seasons     |      |
| Gathering fewer opportunities |      |

- How do the top three affect you in being able to provide for your family?
- How do the top three affect sharing of resources?
- How do the top three affect the roles of the elders in the village?
- How do the top three affect the decision for young people to leave the village?
- Are any of these changes beneficial?

### **Overall ranking**

Please rank the top five most disruptive changes from all the categories.

| Rank | Change |
|------|--------|
| 1    |        |
| 2    |        |
| 3    |        |
| 4    |        |
| 5    |        |

**AKSIK**  
**Questionnaire Script**  
**Summer 2012**

Instructions

Please use the ruler to rank the following statements from 0 (Not Obvious) to 10 (Very Obvious).

Question example. How obvious is it that it will rain today?

**Question: Over the last 20 years or so, how obvious are the following changes?**

**These statements refer to changes we have read about**

| Topic                    | Script                                                                                                                                                    |
|--------------------------|-----------------------------------------------------------------------------------------------------------------------------------------------------------|
| <b>Weather</b>           | It is harder now to know what the weather is going to be like from day to day<br>The weather changes so quickly, it is not consistent                     |
| <b>Seasons</b>           | Summers are longer<br>Fall weather lasts later into the year<br>Winters do not last as long as they used to                                               |
| <b>Storms</b>            | Storms are stronger<br>Storms are more dangerous<br>People are now scared of the storms                                                                   |
| <b>Sea ice melt</b>      | The sea ice goes out earlier in the spring<br><br>When it does go out, it goes out faster<br>The sea ice is not as thick as it used to be                 |
| <b>Sea ice type</b>      | There is less shorefast ice<br>There is less older ice left over from the previous year or years<br>Icebergs don't come here anymore                      |
| <b>Rain</b>              | It rains more now<br>It now rains in the winter<br>It rains more days in a row                                                                            |
| <b>Wind</b>              | The prevailing wind direction has changed<br>The wind changes often<br>It is harder to know what the wind will do from day to day; it is less predictable |
| <b>Ocean</b>             | Ocean currents are moving faster<br>The ocean is getting less salty                                                                                       |
| <b>Tides</b>             | The high tides rise higher on land<br>The low tides don't go down as far                                                                                  |
| <b>Coastline</b>         | The coastline is not as flat<br>Beaches are not as wide<br>The size of the grains on the beaches have changed                                             |
| <b>Erosion</b>           | The tundra is breaking off in to the ocean<br>The tundra is breaking off in to the rivers                                                                 |
| <b>Tundra</b>            | Lakes on the tundra are disappearing<br>Depressions, or holes, are left where lakes once were<br>There is less snow on the tundra                         |
| <b>Permafrost</b>        | You can see melting permafrost along the coast<br>You can see melting permafrost along the rivers<br>You can see melting permafrost out on the tundra     |
| <b>Freshwater runoff</b> | There is more freshwater going in to the rivers and ocean                                                                                                 |

|                        |                                                                                                                                                                                                                            |
|------------------------|----------------------------------------------------------------------------------------------------------------------------------------------------------------------------------------------------------------------------|
| <b>Sediment</b>        | There is more sediment going in to the rivers                                                                                                                                                                              |
| <b>Plants</b>          | Some plants are getting bigger<br>Plants are not blooming when they used to<br>New plant types are appearing                                                                                                               |
| <b>Animals</b>         | Animal migration routes have changed; they don't come the same way<br>Animal migration times have changed, coming at different times of the year<br>Animal migrations are shorter; they appear for shorter periods of time |
| <b>Unusual species</b> | New animals are appearing<br><br>New insects are appearing                                                                                                                                                                 |
| <b>Fishing</b>         | It is harder to know when fishing will be good<br>It is harder to get out to fish as often                                                                                                                                 |
| <b>Hunting</b>         | It is harder to know when hunting will be good<br>It is harder to get out and hunt<br>Hunting conditions are not as safe as before                                                                                         |
| <b>Gathering</b>       | It is harder to know when to gather plants<br>It is harder to find the plants we gather<br>Gathering times are shorter                                                                                                     |

© 2015 by the authors; licensee MDPI, Basel, Switzerland. This article is an open access article distributed under the terms and conditions of the Creative Commons Attribution license (<http://creativecommons.org/licenses/by/4.0/>).
